# Supplementary material for: Cited2 Is an Essential Regulator of Adult Hematopoietic Stem Cells
Source: PubMed Central journal article supplement (PMC2828538; doi:10.1016/j.stem.2009.11.001), 2009-12-04
Supplement: mmc1.pdf [file mmc1.pdf]

## Supplemental Data

### Cited2 Is an Essential Regulator

#### of Adult Hematopoietic Stem Cells

Kamil R. Kranc, Hein Schepers, Neil P. Rodrigues, Simon Bamforth, Ellen Villadsen, Helen Ferry, Tiphaine Bouriez-Jones, Mikael Sigvardsson, Shoumo Bhattacharya, Sten Eirik Jacobsen, and Tariq Enver

#### Supplemental Experimental Procedures:

##### Quantitative RT-PCR probes:

TaqMan Assays-on-Demand probes used were: *Cited2*: Mm00516121\_m1; *Hprt*: Mm00446968\_m1; *B2m*: Mm00437762\_m1; *Gapdh*: Mm99999915\_g1; *Actb*: Mm00607939\_s1; *Ubc*: Mm01201237\_m1; *Bmi-1*: Mm00776122\_gH; *Mel18*: Mm00464756\_m1; *Apc*: Mm00545877\_m1; *c-Myc*: Mm00487803\_m1; *N-Myc*: Mm00476449\_m1; *Cdkn1a*: Mm00432448\_m1; *CITED2*: Hs00366696\_m1; *ACTB*: Hs99999903\_m1; *B2M*: Hs00187842\_m1; *GAPDH*: Hs99999905\_m1; *HPRT1*: Hs99999909\_m1.

##### Lentiviral transductions

The *CITED2* RNA hairpin was NdeI-SpeI subcloned from the pLKO.1 puro vector (Open Biosystems, Oligo ID: TRCN0000015654) into the pLKO.1 GFP vector (gift from J. Larsson, Lund University). The sequence of scrambled oligonucleotide used to generate shRNA was TTCTCCGAACGTGTCACGTT.  $2.5 \times 10^6$  293T Human Embryonic Kidney cells were transfected with 3  $\mu$ g pCMV  $\Delta$ 8.91, 0.7  $\mu$ g VSV-G and 3  $\mu$ g of either pLKO.1 scrambled shRNA (gift from J. Larsson, Lund University), pLKO.1 *CITED2* shRNA, *IRES-GFP* (control) or *CITED2-IRES-GFP* vectors. After 24 hours medium was changed to HPGM (Cambrex, Verviers, Belgium) and after 12 hours supernatant containing lentiviral particles was harvested and stored at -80°C. Cord blood CD34<sup>+</sup> cells were

isolated with MiniMACS columns and subsequently cultured in HPGM supplemented with human c-KIT ligand, FLT3 ligand (both from Amgen, USA) and TPO (100 ng/ml each) for 16 hours at 37°C and 5% CO<sub>2</sub>. Cord blood CD34<sup>+</sup> cells were transduced in 2 consecutive rounds of 8 to 12 hours with lentiviral supernatant supplemented with c-Kit ligand/FLT3 ligand/TPO (100 ng/ml each) and Polybrene (4 µg/ml). Transduction efficiency was measured by FACS analysis and knock-down was assessed by Q-PCR.

## **FACS**

Antibodies used for cell surface staining were CD19 (1D3), B220 (RA3-6B2), Gr-1 (RB6-8C5), CD11b/Mac-1 (M1/70), CD4 (H129.9), CD8a (53-6.7), SCA-1 (E13-161.7), c-KIT (2B8), CD45.2 (104), CD34 (RAM34), FLT3 (AZF10.1) (all from BD Pharmingen). Polyclonal goat-anti-rat Tricolor was purchased from Caltag.

## **Human cord blood cell culture conditions**

Long Term Culture medium (αMEM supplemented with 12.5% FCS, 12.5% Horse serum (Gibco), 1% penicillin and streptomycin, 200 mM Glutamine, 57.2 µM β-mercaptoethanol (Sigma) and 1 µM hydrocortisone (StemCell Technologies)) was used to co-culture cord blood cells with MS5 stromal cells. Cultures were kept at 37°C and 5% CO<sub>2</sub>.

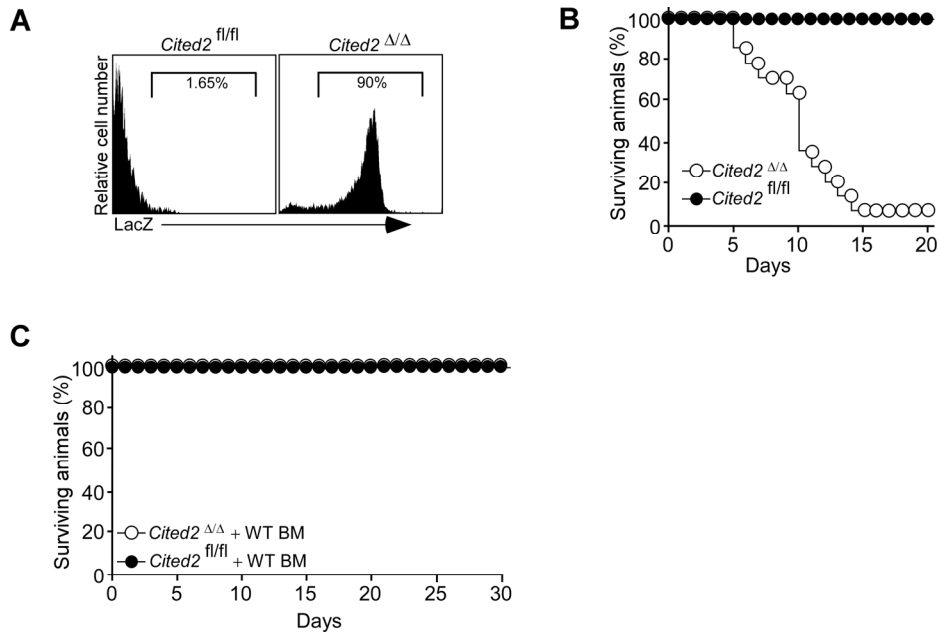

**Figure S1. Deletion of *Cited2* in adult mice using *Mx1-Cre* results in premature lethality which can be rescued by wild-type bone marrow.**

(A) LacZ expression in bone marrow cells from *Cited2*<sup>Δ/Δ</sup> and control mice. As Cre-mediated deletion of exon 2 brings the *lacZ* cassette under control of the endogenous *Cited2* promoter, the analysis of lacZ expression allows the confirmation of deletion of conditional alleles of *Cited2*.

(B) Kaplan-Meier survival curve for cohorts of 10 mice of each genotype injected with pIpC. Mice were treated with pIpC according to schematic in Figure 1B.

(C) Survival curve of *Cited2*<sup>Δ/Δ</sup> mice transplanted with wild-type bone marrow. Wild-type bone marrow cells were transplanted into lethally irradiated *Cited2*<sup>fl/fl</sup> *Mx1-Cre* and *Cited2*<sup>fl/fl</sup> control mice (n=9 for each genotype). 12 weeks after transplantation recipient mice were treated with 300 μg pIpC as indicated in Figure 1B. The graph shows the percentage of surviving mice.

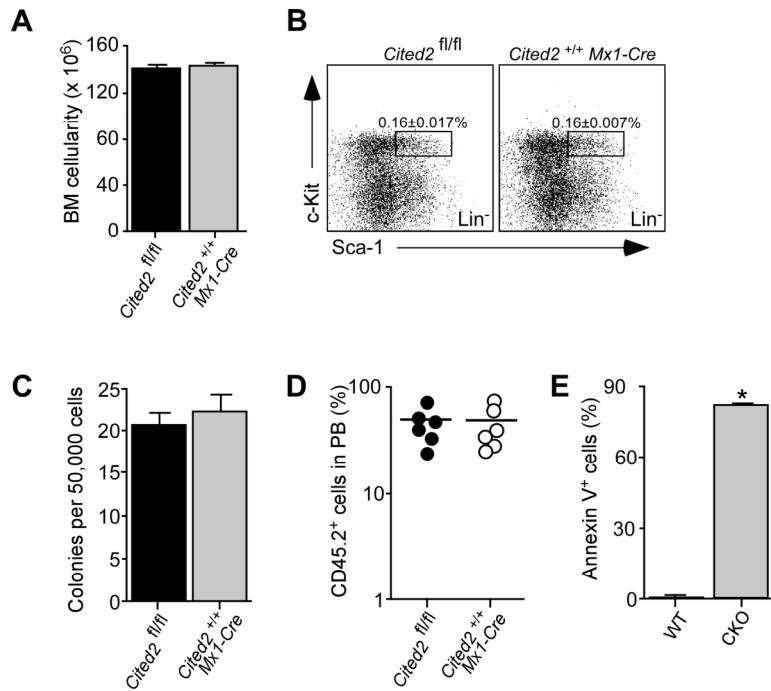

**Figure S2. (A-D) Properties of stem and progenitor cells from *Cited2<sup>+/+</sup> Mx1-Cre* and *Cited2<sup>fl/fl</sup>* mice. (E) Defective survival of LSK cells lacking *Cited2*.**

*Cited2<sup>+/+</sup> Mx1-Cre* and *Cited2<sup>fl/fl</sup>* mice were treated with pIpC according to the schematic in Figure 1B and BM was analysed 5 days after the last pIpC administration.

(A) BM cellularity in pIpC-treated *Cited2<sup>+/+</sup> Mx1-Cre* and *Cited2<sup>fl/fl</sup>* mice (n=3±SD).

(B) Immunophenotypic analysis of the BM LSK compartment in pIpC-treated *Cited2<sup>+/+</sup> Mx1-Cre* and *Cited2<sup>fl/fl</sup>* mice (n=3±SD).

(C) CFC assays with BM cells obtained from pIpC-treated *Cited2<sup>+/+</sup> Mx1-Cre* and *Cited2<sup>fl/fl</sup>* mice (n=3±SD).

(D) Competitive repopulation assay. BM cells from pIpC-treated *Cited2<sup>+/+</sup> Mx1-Cre* and *Cited2<sup>fl/fl</sup>* mice were mixed in a 1:1 ratio with competitor CD45.1<sup>+</sup> BM cells and transplanted into lethally irradiated CD45.1<sup>+</sup> recipients. Reconstitution was analysed 16 weeks after transplantation. Data are shown as percentage of CD45.2<sup>+</sup> cells in peripheral blood (n=6 mice per group).

(E) We bred *Cited2* conditional knockout mice with *Rosa26<sup>CreERT/+</sup>* mice, in which efficient deletion of floxed genes is induced by tamoxifen. We generated *Cited2<sup>fl/fl</sup> Rosa26<sup>CreERT/+</sup>* (CKO) and *Cited2<sup>+/+</sup> Rosa26<sup>CreERT/+</sup>* (WT) mice and sorted bone-marrow LSK populations from these mice. The cells were cultured in the presence of 1 μM tamoxifen and apoptosis was detected by Annexin-V staining. Graph shows percentage of Annexin-V<sup>+</sup> cells of indicated genotypes.

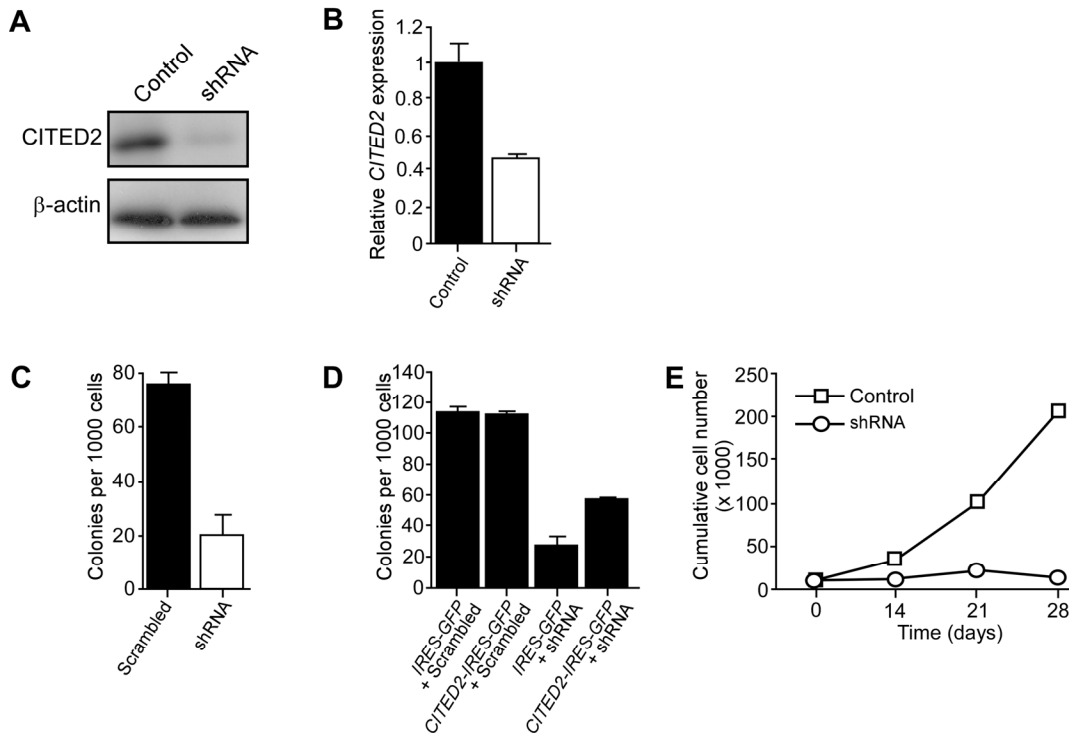

**Figure S3. Human cord blood CD34<sup>+</sup> cells with *CITED2* knockdown fail to sustain hematopoiesis in vitro.**

(A) 293T HEK cells were infected with control scrambled and shRNA lentiviruses. The efficiency of knockdown was determined by western blotting. *Top panel*: western blot of total cell lysates was probed with an anti-CITED2 monoclonal antibody (JA22, Abcam, Cambridge, UK). *Bottom panel*: western blot was re-probed with an anti- $\beta$ -actin (C4, MP Biomedicals, UK) monoclonal antibody to confirm equal loading.

(B) Relative expression of *CITED2* mRNA in CD34<sup>+</sup> cord blood cells infected with lentiviruses expressing *CITED2* shRNA and a control lentivirus (scrambled shRNA). The data are presented as the mean  $\pm$  SEM of triplicate assays in which *CITED2* expression was normalised to the expression of *GAPDH*.

(C) CFC assay. Human CD34<sup>+</sup> CB cells were infected with shRNA and control lentiviruses and cultured in methylcellulose for 2 weeks. The graph shows representative data (mean colony number  $\pm$  SD) of 3 independent experiments performed in duplicate.

(D) CD34<sup>+</sup> cord blood cells were transduced with *CITED2-IRES-GFP* (expressing a human full-length *CITED2* driven by human *EF1 $\alpha$*  promoter) and control *IRES-GFP* lentiviruses. Transduced GFP<sup>+</sup> cells were then superinfected with shRNA and scrambled control lentiviruses and cultured in methylcellulose for two weeks. The graph shows the mean numbers of colonies ( $\pm$  SD) and is a representative of two independent experiments performed in duplicate.

(E) MS5 co-cultures of human cord blood CD34<sup>+</sup> cells transduced with shRNA and control lentiviruses. 30,000 cells were plated in MS5-precoated T25 culture flasks in 5 ml Long-Term Culture medium. Half of the cultures were harvested weekly and fresh medium was added to the culture. Cumulative cell numbers for a representative growth curve are shown (n=4).

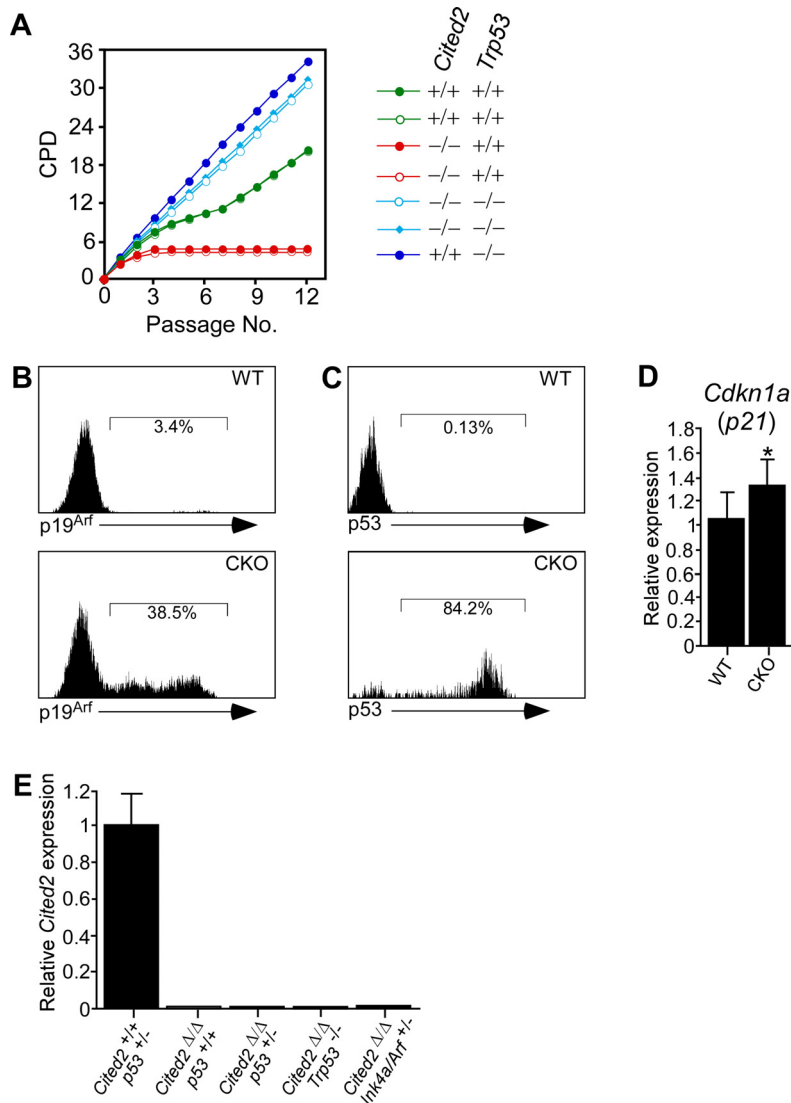

**Figure S4. *Cited2* functions genetically upstream of *Ink4a/Arf* and *Trp53*.**

(A) MEFs obtained from embryos at 13.5 dpc were serially passaged according to the 3T3 protocol. Cell proliferation is shown as a plot of cumulative population doubling (CPD) versus passage number. Genotypes are indicated.

(B and C) BM LSK populations were sorted from *Cited2*<sup>+/+</sup> *Rosa26*<sup>CreERT/+</sup> (WT) and *Cited2*<sup>fl/fl</sup> *Rosa26*<sup>CreERT/+</sup> (CKO) mice. The cells were cultured in StemSpan medium in the presence of SCF, FLT3 ligand and TPO (100 ng/ml each) and 0.5 μM tamoxifen for 2-3 days. Cells were fixed with 4% paraformaldehyde, permeabilized with 0.2% Triton-X100 and the expression of p19<sup>Arf</sup> and p53 was detected using Ab80 (Abcam) and CM5 (Novocastra) antibodies, respectively. Data are representative of 2 experiments.

(B) Percentage of p19<sup>Arf</sup>-expressing cells cultured in the presence of tamoxifen for 2 days.

(C) Percentage of p53-positive cells cultured with tamoxifen for 3 days.

(D) Expression of *Cdkn1a* in LSK cells lacking *Cited2*. LSK cells were sorted from *Cited2*<sup>fl/fl</sup> (WT) and *Cited2*<sup>fl/fl</sup> *Mx1-Cre* (CKO) mice. The cells were cultured in the presence of IFN-α for 36 hours to induce Mx1-Cre-mediated gene deletion. Q-PCR reactions were performed to determine the relative expression of *Cdkn1a* (n=3±SD, \*p<0.005). *Cdkn1a* expression was normalised to the expression of *Hprt* and *Gapdh*.

(E) Relative expression of *Cited2* mRNA in total bone marrow samples obtained from mice used for experiments in Figure 4A, 4C and 4D. The data are presented as the mean

± SEM of triplicate assays in which *Cited2* expression was normalised to the expression of *Hprt*. Expression levels in *Cited2*<sup>+/+</sup> *Mx1-Cre* *Trp53*<sup>+/-</sup> mice were set to 1. Mouse genotypes are indicated.
